# Supplementary material for: Trajectories of change after a health-education program in Japan: decay of impact in anxiety, depression, and patient-physician communication
Source: PeerJ journal article supplement (doi:10.7717/peerj.7229), 2019-07-15
Supplement: GMM-PeerJ_codebook.pdf [file GMM-PeerJ_codebook.pdf]

| Column letter | Column name    | Meaning                                                                                                     |
|---------------|----------------|-------------------------------------------------------------------------------------------------------------|
| A             | GMM_PeerJ_ID   | Serial ID numbers, starting at 1                                                                            |
| B             | Gender         | 2 for women, 1 for men                                                                                      |
| C             | Age            | In years                                                                                                    |
| D             | College?       | 1 indicates having finished college, 0 indicates all others                                                 |
| E             | Marital status | 1 indicates married and living together with spouse ("partnered" in the Tables), and 0 indicates all others |
| F             | DM             | Diabetes, yes or no?                                                                                        |
| G             | CVD            | Cardiovascular disease, yes or no?                                                                          |
| H             | Rheumatoid     | Rheumatoid arthritis, yes or no?                                                                            |
| I             | CTD            | Connective tissue disease, yes or no?                                                                       |
| J             | FMS            | Fibromyalgia syndrome, yes or no?                                                                           |
| K             | Asthma         | Asthma, yes or no?                                                                                          |
| L             | Allergic       | Allergic disease, yes or no?                                                                                |
| M             | pulmonaryDx    | Pulmonary disease, yes or no?                                                                               |
| N             | Cancer         | Cancer, yes or no?                                                                                          |
| O             | Depression     | Depression, yes or no?                                                                                      |
| P             | Parkinson      | Parkinson's disease, yes or no?                                                                             |
| Q             | IBD            | Inflammatory bowel disease, yes or no?                                                                      |
| R             | NumOthers      | Number of other diagnoses                                                                                   |
| S             | NumDx          | Total number of diagnoses                                                                                   |
| T             | Historyyear    | Length of time, in years, since the first diagnosis of any chronic condition                                |
| U             | SE0m           | Self-efficacy at baseline (0 months)                                                                        |
| V             | SE3m           | Self-efficacy 3 months after baseline                                                                       |
| W             | SE6m           | Self-efficacy 6 months after baseline                                                                       |
| X             | SE12m          | Self-efficacy 12 months after baseline                                                                      |
| Y             | Anxiety0m      | Anxiety at baseline (0 months)                                                                              |
| Z             | Anxiety3m      | Anxiety 3 months after baseline                                                                             |
| AA            | Anxiety6m      | Anxiety 6 months after baseline                                                                             |
| AB            | Anxiety12m     | Anxiety 12 months after baseline                                                                            |
| AC            | Depression0m   | Depression at baseline (0 months)                                                                           |
| AD            | Depression3m   | Depression 3 months after baseline                                                                          |
| AE            | Depression6m   | Depression 6 months after baseline                                                                          |
| AF            | Depression12m  | Depression 12 months after baseline                                                                         |
| AG            | ComMD0m        | Communication with physicians at baseline (0 months)                                                        |
| AH            | ComMD3m        | Communication with physicians 3 months after baseline                                                       |
| AI            | ComMD6m        | Communication with physicians 6 months after baseline                                                       |
| AJ            | ComMD12m       | Communication with physicians 12 months after baseline                                                      |
